# Supplementary material for: Structure-guided mutagenesis of a mucin-selective metalloprotease from Akkermansia muciniphila alters substrate preferences
Source: PubMed Central journal article supplement (PMC9118916; doi:10.1016/j.jbc.2022.101917), 2022-04-09
Supplement: mmc1.pdf [file mmc1.pdf]

## Supporting Information

### Structure-guided mutagenesis of a mucin-selective metalloprotease from *Akkermansia muciniphila* alters substrate preferences

D. Judy Shon, Daniel Fernandez, Nicholas M. Riley, Michael J. Ferracane, Carolyn R. Bertozzi

This file contains Tables S1 to S4 and Figures S1 to S13

Other supplemental materials for this manuscript include the following:

Dataset S1. O-glycopeptides from 24-h digests

Dataset S2. O-glycopeptides from 72-h digests

Dataset S3. O-glycopeptide sequence frequencies

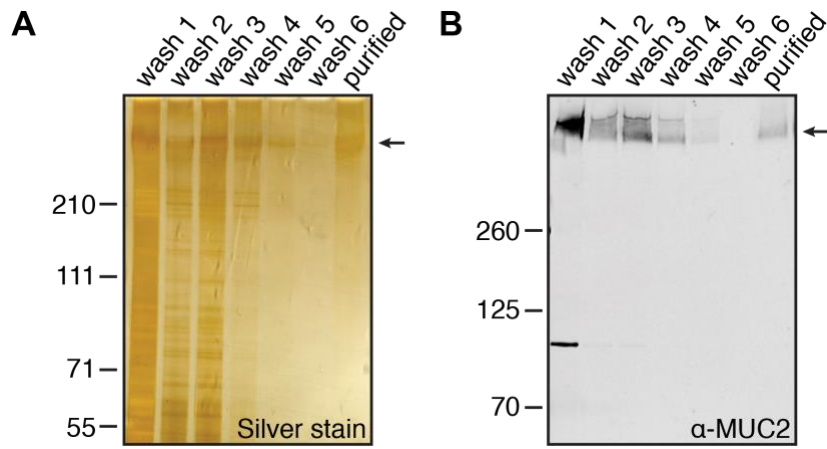

**Figure S1. Purification of MUC2.** A, SDS-PAGE analysis of washes and the purified product quantified using a SilverXpress Silver Staining Kit. B, western blot of washes and the purified product with MUC2 antibody (clone 996/1). The MUC2 band is indicated by the black arrow.

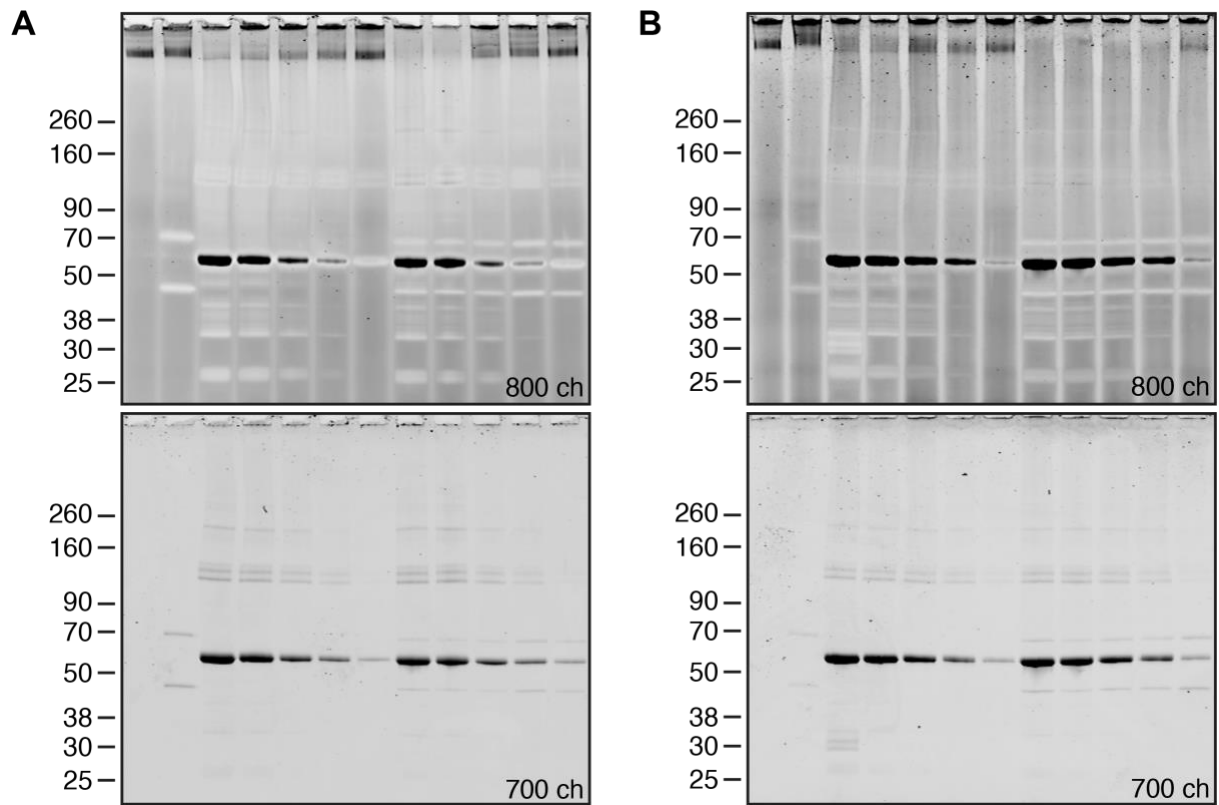

**Figure S2. Uncropped MUC2 digest gels.** *A* and *B*, uncropped gels corresponding to Fig. 1B-C of IRdye 800CW-labeled MUC2 digests with varying concentrations of AM0627  $\pm$  1 U SialEXO at low (*A*) or high (*B*) enzyme-to-substrate (E:S) ratio for 22 h at 37 °C.

**Table S1. Data collection and refinement statistics**

|                                                                             |                                                             |
|-----------------------------------------------------------------------------|-------------------------------------------------------------|
| <b>Data collection</b>                                                      |                                                             |
| Beamline                                                                    | SSRL BL12-2                                                 |
| Wavelength (Å)                                                              | 0.97946                                                     |
| Space group                                                                 | P6 <sub>5</sub>                                             |
| Cell dimensions                                                             |                                                             |
| <i>a</i> , <i>b</i> , <i>c</i> (Å)                                          | 101.56, 101.56, 114.63                                      |
| $\alpha$ , $\beta$ , $\gamma$ (°)                                           | 90.00, 90.00, 120.0                                         |
| Solvent content (%) <sup>a</sup>                                            | 60.0                                                        |
| Resolution (Å) <sup>b</sup>                                                 | 38.21(1.90)                                                 |
| No. of reflections / unique                                                 | 448,086 / 52,780                                            |
| <i>R</i> <sub>merge</sub> <sup>c</sup>                                      | 0.105(0.738)                                                |
| <i>I</i> / $\sigma$ <i>I</i> ratio and CC <sub>1/2</sub> <sup>d</sup>       | 8.9(1.6) / 0.995(0.681)                                     |
| Completeness (%) <sup>e</sup>                                               | 99.9(99.8)                                                  |
| Redundancy <sup>f</sup>                                                     | 4.9(3.9)                                                    |
| <b>Refinement</b>                                                           |                                                             |
| Resolution (Å)                                                              | 30.0-1.90                                                   |
| No. of reflections / test set                                               | 50,020 / 2,666                                              |
| <i>R</i> <sub>work</sub> / <i>R</i> <sub>free</sub> <sup>g</sup>            | 16.2 / 19.5                                                 |
| <i>F</i> <sub>obs</sub> - <i>F</i> <sub>calc</sub> correlation <sup>h</sup> | 0.97                                                        |
| No. of atoms                                                                |                                                             |
| Protein                                                                     | 3,895                                                       |
| Ligand/ion                                                                  | 1 (zinc) / 1 (chlorine) / 10 (PEG) / 24 (formate)           |
| Water                                                                       | 347                                                         |
| <i>B</i> -factors                                                           |                                                             |
| Protein                                                                     | 28.6                                                        |
| Ligand/ion                                                                  | 30.1 (zinc) / 45.0 (chlorine) / 58.1 (PEG) / 48.2 (formate) |
| Water                                                                       | 38.1                                                        |
| R.m.s. deviations                                                           |                                                             |
| Bond lengths (Å)                                                            | 0.015                                                       |
| Bond angles (°)                                                             | 1.711                                                       |
| Ramachandran statistics <sup>i</sup>                                        |                                                             |
| Most favored regions (%)                                                    | 99.5 (415 out of 417 non-proline/non-glycine residues)      |
| Disallowed regions (%)                                                      | 0.5                                                         |

<sup>a</sup>Ratio of the volume of the asymmetric unit to the molecular weight of all protein molecules in the asymmetric unit

<sup>b</sup>Value in parentheses is for the highest resolution shell: 1.90 – 2.00 Å

<sup>c</sup>Reliability factor for symmetry-related reflections calculated as:  $R_{\text{merge}} = \frac{\sum_{\text{hkl}} \sum_{j=1}^N |I_{\text{hkl}} - I_{\text{hkl}}(j)|}{\sum_{\text{hkl}} \sum_{j=1}^N I_{\text{hkl}}(j)}$ , where *N* is the redundancy of the data. In parentheses, the cumulative value at the highest resolution shell

<sup>d</sup>Ratio of mean intensity to the mean standard deviation of the intensity over the entire resolution range and correlation coefficient for random half-datasets for merged data

<sup>e</sup>Fraction of measured reflections to possible observations at the resolution range

<sup>f</sup>Number of measurements of individual, symmetry unique reflections

<sup>g</sup>Average deviation between the observed and calculated structure factors calculated as:  $R_{\text{work}} = \frac{\sum_{\text{hkl}} ||F_{\text{obs}}| - |F_{\text{calc}}||}{\sum_{\text{hkl}} |F_{\text{obs}}|}$ , where the *F*<sub>obs</sub> and *F*<sub>calc</sub> are the observed and calculated structure factor amplitudes of reflection *hkl*. *R*<sub>free</sub> is equal to *R*<sub>factor</sub> but for a randomly selected 5.0% subset of the total reflections that were held aside throughout refinement for cross-validation

<sup>h</sup>Correlation coefficient between observed and calculated structure factor amplitudes

<sup>i</sup>According to Procheck for non-proline and non-glycine residues

**Table S2. DALI statistics for top 10 unique hits**

| PDB  | Description                                                                      | Z-score | RMSD <sup>a</sup> (Å) | No. aligned residues |
|------|----------------------------------------------------------------------------------|---------|-----------------------|----------------------|
| 4FCA | Conserved protein from <i>Bacillus anthracis</i> str. Ames                       | 37.9    | 2.7                   | 374                  |
| 5KD5 | BT_4244 metallopeptidase from <i>Bacteroides thetaiotaomicron</i>                | 34.3    | 2.6                   | 413                  |
| 6XSZ | M60 catalytic domain from <i>Clostridium perfringens</i> ZmpC                    | 31.9    | 2.8                   | 374                  |
| 5KDJ | ZmpB metallopeptidase from <i>Clostridium perfringens</i>                        | 26.8    | 2.9                   | 373                  |
| 6XSX | Catalytic module of the metalloprotease ZmpA from <i>Clostridium perfringens</i> | 25.8    | 3.0                   | 367                  |
| 7JTV | IMPa from <i>Pseudomonas aeruginosa</i>                                          | 22.1    | 3.2                   | 356                  |
| 3QNF | Human endoplasmic reticulum aminopeptidase 1 ERAP1                               | 10.5    | 10.8                  | 233                  |
| 1Z5H | Tricorn interacting Factor F3 from <i>Thermoplasma acidophilum</i>               | 10.5    | 8.0                   | 236                  |
| 4F5C | Pig aminopeptidase N ectodomain                                                  | 10.4    | 12.1                  | 235                  |
| 6U7E | Human aminopeptidase N                                                           | 10.4    | 10.3                  | 243                  |

<sup>a</sup>Root-mean-square deviation

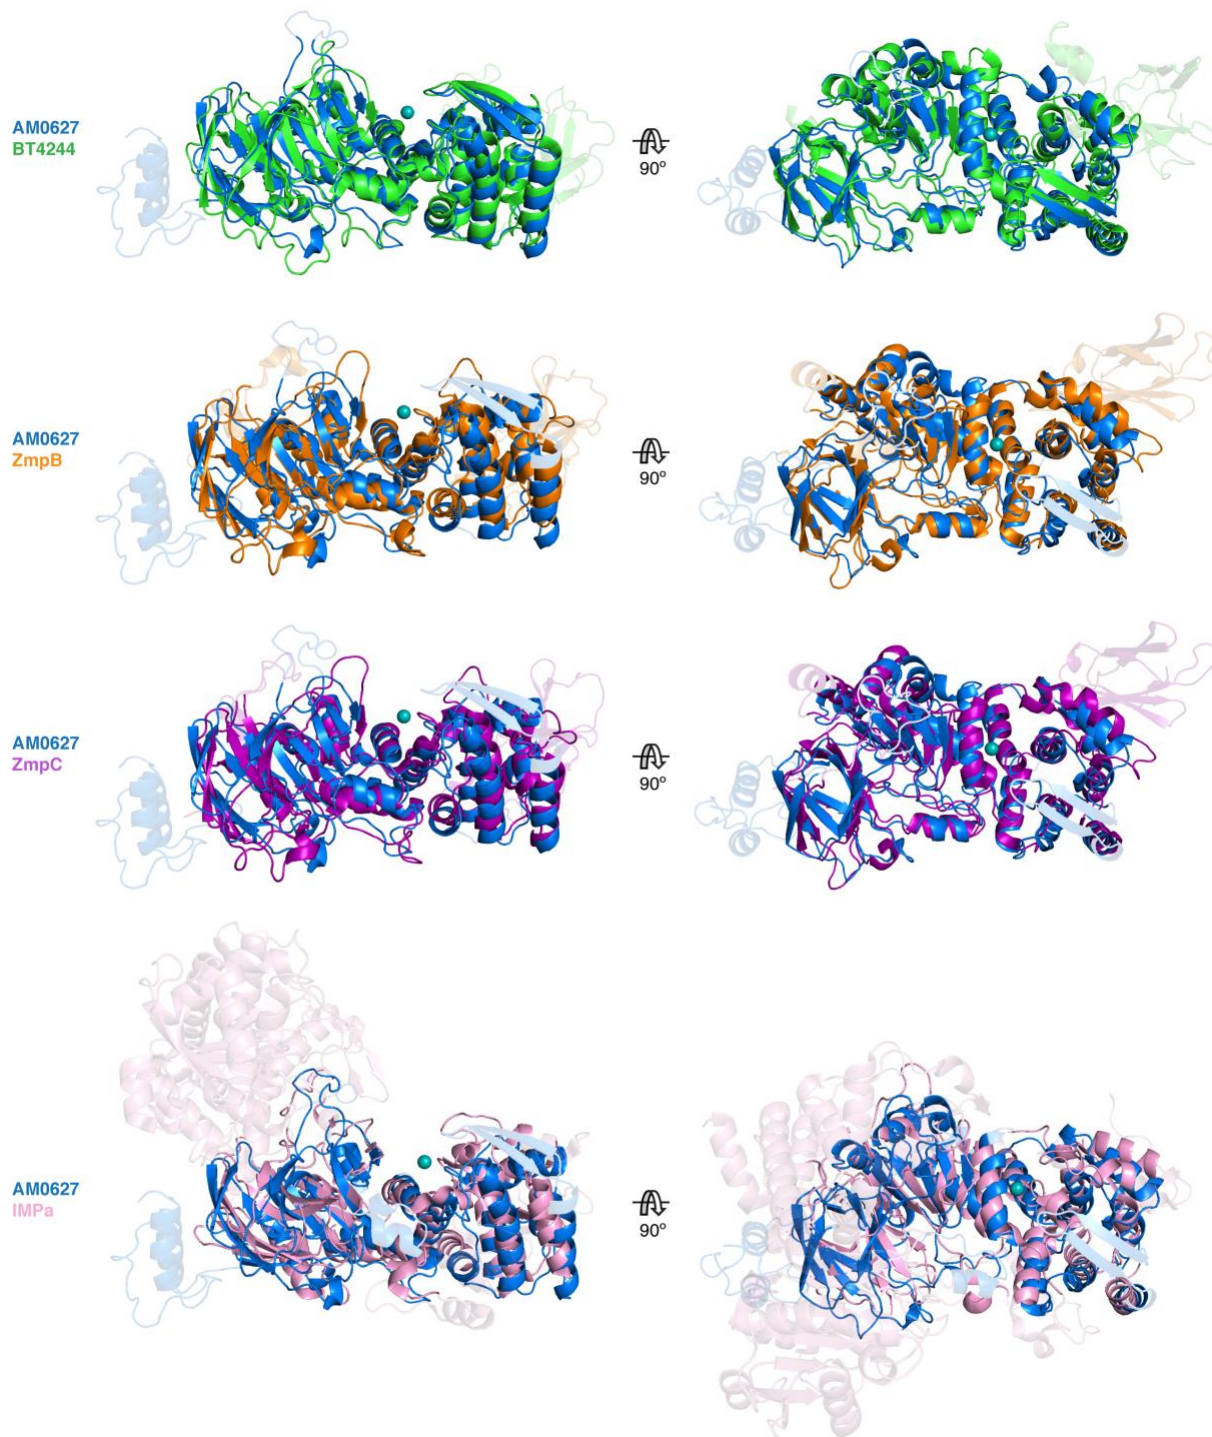

**Figure S3. Superposition of PF13402 proteases.** Superposition of PF13402 proteases with AM0627. Structurally aligned regions identified using the DALI server are highlighted.

AM0627 21 ANTPEHIGNDLKLFKDDSSCTSLKPDVKNTSAFQSDAMKELATKILAGHYKPDYLYAEYRALPSPRQTGKNLRIGDGFSGKYDNMTGVYLEK-GRH 113  
BT4244 325 EKEFRIRSYEPYSNIAEWADKLMTKK-YSLDLNPFGISVKAGDDI 368

114 VVLVGKTEGQEISLLLPNLMRKAPEGVQPTKDPNGWGLH--KKQIPLKEGINIIDVETPANAYISYFTEDAGK--APKIPVHFV--TGKANGYF 201  
369 IVLVGDYQGNISMQCIW-ETGT-----EYKQTAssGDVYMLNPGVYKLTMTKMGEGQLFVMYNT-ELTSntAKPIKIHIPlgSGTVNGFF 450

202 DTTTRGDTNKDWVRLDQAVSPIMDARGKYIQVAYPVEFLKFKFTKDRGTELINAYDKLIGIQYQLMGLDKYGI---PENRVLARVNFNYMFRD 292  
451 DLKEHKTEDEKYAELLKSTHKYFCIRGEKIMFYFHRNKLLEYVPPNLSAHLWDNIVGWQQLMGI--DDVrpsqVNNHLFAISPEGSYMWAS 542

293 GDGVAYLGNdGTMRMVTDPEENVL-KGDACWGFSEVGHVQMMPMTWGGMTEVSNNIFSLQAAAKTG-NEsRLKRQGSYDKARKEIEGEIAYL 384  
543 DYQIGFVYT--YLGNIILEDVNVMAEDNAGPAHEIGHVHQAA-INWASSTESNNLFSNFIIYKLGkYKSRG---NGLGSVATARYANGQAWY 630

385 QSK-----DVFNKLVLWQLHLHYFT-KNGHPDFYPDVMEYLRNAGNYGGNDTVKYQFEFVKACCDVTKTDLTDFEFKGGFFKPKGFHIGDY 470  
723 NMGdathqneDTEthMRMNWQLWIYHrCEYKTDfWQTLFKLMRE-VNMTEGEDPGKKQLEFAKMASKAANQNLTDFEFMGWGFPEVNTTIEQY 723

471 AQYDFNVTPEMVEETKKWIAGKGYPKPETDITELSE 506  
724 GTYKYYVSDAMIREAKEYMAQ--FPAPKHAFQYIED 757

  

AM0627 21 ANTPEHIGNDLKLFKDDSSCTSLKPDVKNTSAFQSDAMKELATKILAGHYKPDYLYAEYRALPSPRQTGKNLRIGDGFSGKYDNMTGVYLEK-GRH 113  
ZmpB 497 VLELEMRGDSISEAKKRKVW-NFQD-WQITGLSARAgDKI 534

114 VVLVGKT-EGQEISLLLPNLMRKAPEGVQPTKDPNGWGLHKKQIPLKEGINIIDVET-----PANAYISYFTEDAGKA-PKIPVH 191  
535 TVYVDVAeGDPPTLLYRQMT-----QHGGAKTFQLQNGKNEIIVIPelDktsngisegtIQGGEFFFTNYN--SDSQkRAPKIR 612

192 FVTGKANGYFDTTTRGDTNKDWVRLDQA-----VSPIMDARGKYIQVAYPVEFLKFKTK---DRGTELINAYDKLIGIQYQLMGLDKY- 271  
613 IEGASKYPVFFILGK-SDENEVMKELEAYvekikaepktTPNIFAVSSNKSLFVQATYALDWYKknnKTPKYTAEQWDQYIADAMGFWGFDNSK 705

272 --GKIPENRVLARVNFNY---YMFrdGDGVAYLGNdGTMRMVTDPEENVLKGDACWGFSEVGHVQMMPMTWGGMTEVSNNIFSLQAAAKTGNE 360  
706 dvNSDFNFRIMPVKNLsggaFMNAGNGVIGIRPG--NQDAIL--AANK---GwGVAHELGHNFDTGGRt---IVEVTNMMPLFFESKYTK 788

361 SRLKRQGSYDKARKEIEG---EIAYLQS--KDVFNKLVLWQLHLHYFTKNGHPDFYPDVMEYLRNAGNYGGNDTVKYQFEFVKACCDVTKT 448  
789 TRITDQNIWENNTYPKVGLddysNNELYNKadSTHLaQLAPLWQLYLYDN----TFYgKFERQFRERDFGNK--NREDIYKSWVVAASDAMEL 875

449 DLTDFFFEKGGFFKPKGFHIGDYAQYDFNVTPEMVEETKKWIAGKGYPKPETDITELSE 506  
876 DLTEFFARHGIR-----vDDKVKEDLA--KYPKPKDKKIYYLND 911

  

AM0627 21 ANTPEHIGNDLKLFKDDSSCTSLKPDVKNTSAFQSDAMKELATKILAGHYKPDYLYAEYRALPSPRQTGKNLRIGDGFSGKYDNMTGVYLEK-GRH 113  
ZmpC 492 VLELEMRGNSVQEANRKMWG-FQDW-QVTGLSALAgDKI 529

114 VVLVGKT-EGQEISLLLPNLMRKAPEGVQPTKDPNGWGLHKKQIPLKEGINIIDVE-----TPANAYISYFTEDAGKA-PKIPVH 191  
530 TVYVDVAeGEPPTLLYRQMT-----QHGGAKTFQLQNGKNEIIVIPelDktsngisegtIQGGEFFFTNYN--SDSQkRAPKIR 607

192 FVTGKANGYFDTTTRGDTNKDWVRLDQA-----VSPIMDARGKYIQVAYPVEFLKFKTK---DRGTELINAYDKLIGIQYQLMGLDKY 272  
608 IEGAKEYVFFVLGE-SDedKVIKELEAYvekiekepetTPDIFAVSSNKSLSLTQATYALEWYKnnnKTPKYTAESWDKIVENAMDFWGYDNSS 700

273 ---KIPENRVLARVNFNY---YMFrdGDGVAYLGNdGTMRMVTDPEENVLKGDACWGFSEVGHVQMMPMTWGGMTEVSNNIFSLQAAAKTGNE 360  
701 elnSDFNFRIMPVKNLTggaFMNAHSGVIGIRPG--NQNCIV--GADM---GwGTHHELGHNFDTSGRt---IAEVTNMMPLFYFESLNRTQ 783

361 SRLKRQGSYDKARKEIEG---EIAYLQS--KDVFNKLVLWQLHLHYFTKNGHPDFYPDVMEYLRNAGNYGGNDTVKYQFEFVKACCDVTKT 448  
784 TRITDQNIWENNTYPKVGLddysNNKLYNTsdSTHLaQLAPLWQLYLYDN----TFYgKFEQQFRANNYGNK--TREDIYKSWVVAASNAMQL 870

449 DLTDFFFEKGGFFKPKGFHIGDYAQYDFNVTPEMVEETKKWIAGKGYPKPETDITELSE 506  
871 DLTEFFARHGIR-----INDEVAQEISSK-YEKPKDKKIYYLND 907

  

AM0627 21 ANTPEHIGNDLKLFKDDSSCTSLKPDVKNTSAFQSDAMKELATKILAGHYKPDYLYAEYRALPSPRQTGKNLRIGDGFSGKYDNMTGVYLEK-GRH 113  
IMPa 437 GSE--TLTLTLPsAQ-----gFTAIGRMAAPgKRL 465

114 VVLVGKTEGQEISLLLPNLM--RKPA-EGVQPTKDPNGWGLHKKQIPLKEG-INIIDVETPANAYISYF-TEDAGKAPKIPVHFVTGKANGYF 201  
466 SIRIEDAGQASLAVGLNTQrigSTRLwNTRQ---YDRP-rfLKSpdIKLQANqSVALVSPYGLLQLVYSgATPGQ---TVTvkvtGAASQPF 552

202 DTT---RGDTNKDWVRLDQAVSPIMDARGKYIQVAYPVEFLKFKTK---DRGTELINAYDK-LIGIQYQLMGLD----- 269  
553 DIQpgeSSQAIADFIQALDADKADWLEIRSGSVEVHAKVEKVRGSIDkdyGDVQRfIRELNEvFIDDAyTLAGFAipnqaktpaiqgecaar 646

270 ---KYGK---IPENRVLARVNFN---YMFrdGDGVAYLGNdGTMRMVTDPEENVLKGDACWGFSEVGHVQMMPMT--WGGMTEVSNNIFSLQ 352  
647 gwdCDSEtlhKLPgTQHINVDQYaqcGGGCSG-NPYDQT---WGLN-----pRGWGESHELGHNLQVNRlkVYGGRSSEISNQIFPLH 725

353 AAAKTG-----NESRLKRQGSYDKARKEIEGE-----IAYLQS---KDVFNKLVLWQLHLHYFTKNG----HPDFYPDVMEYL 420  
726 KDWRVlrefgqnlDDTRV---NYRNAYNL-IVAGraeadplagvyKRLWEDpptyALNGERMAFYTQWVHYWADLkndplqGWDIWTLLYLHQ 814

421 RNNA-----GNyGGNDTVKYQFEFVKACCDVTKTDLTDFEFKGGFFKPKGFHIGDYAQYDFNVTPEMVEETKKWIAGK 494  
815 RQVDksdwdankaalggytYaqrpGNSGDASSTdGNDNLLGLSWLQTRDQRPTfALWgIR-----tSAAAQAQVAAYG 888

495 YPKPETDITELSE 506  
889 FAEQP-AFFYANN 900

**Figure S4. Sequence alignments between PF13402 proteases.** Sequence alignments of PF13402 proteases with AM0627 for structurally similar regions identified using the DALI server. Conserved residues are colored based on side chain chemistry (green: nonpolar, pink: polar, orange: aromatic, blue: acidic, red: basic).

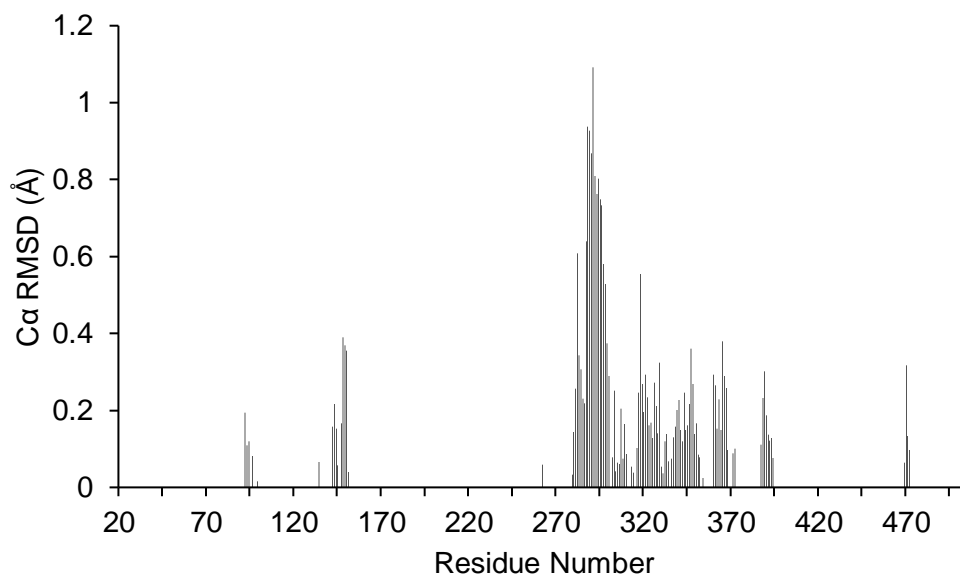

**Figure S5. Alpha carbon RMSD values.** Root-mean-square deviation (RMSD) values for the alpha carbons of the AM0627 crystal structure and final peptide-docked model structure.



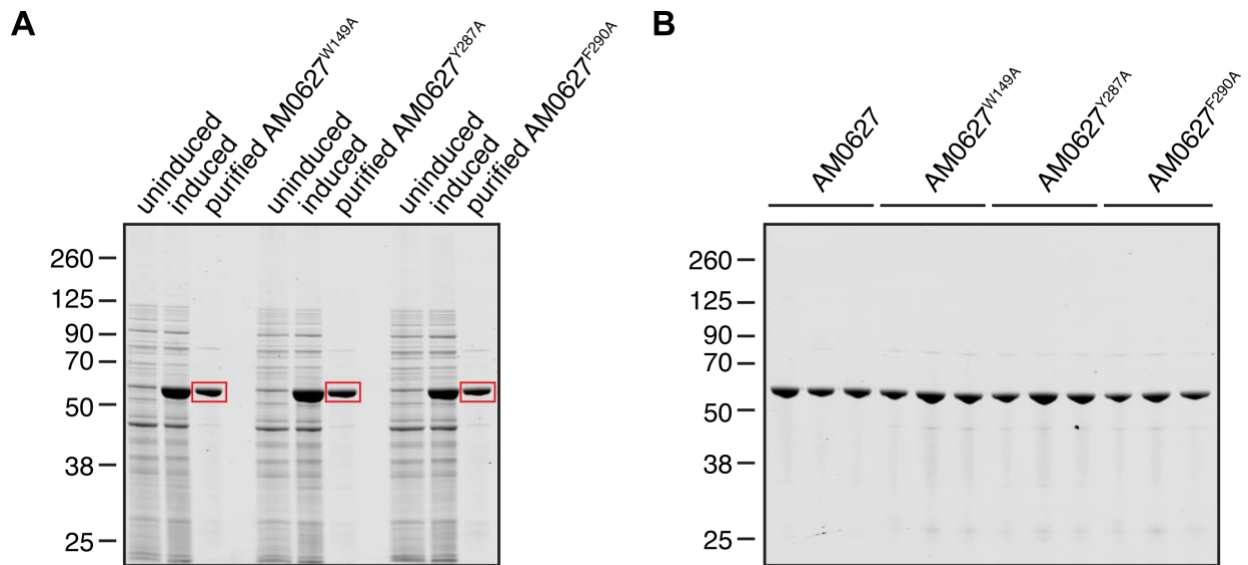

**Figure S6. Purification of AM0627 point mutants.** *A*, SDS-PAGE analysis of uninduced lysate, induced lysate, and the purified product visualized using Coomassie stain. Protein bands corresponding to each point mutant are denoted by red boxes. *B*, SDS-PAGE analysis of three independent purifications of each variant visualized by Coomassie stain.

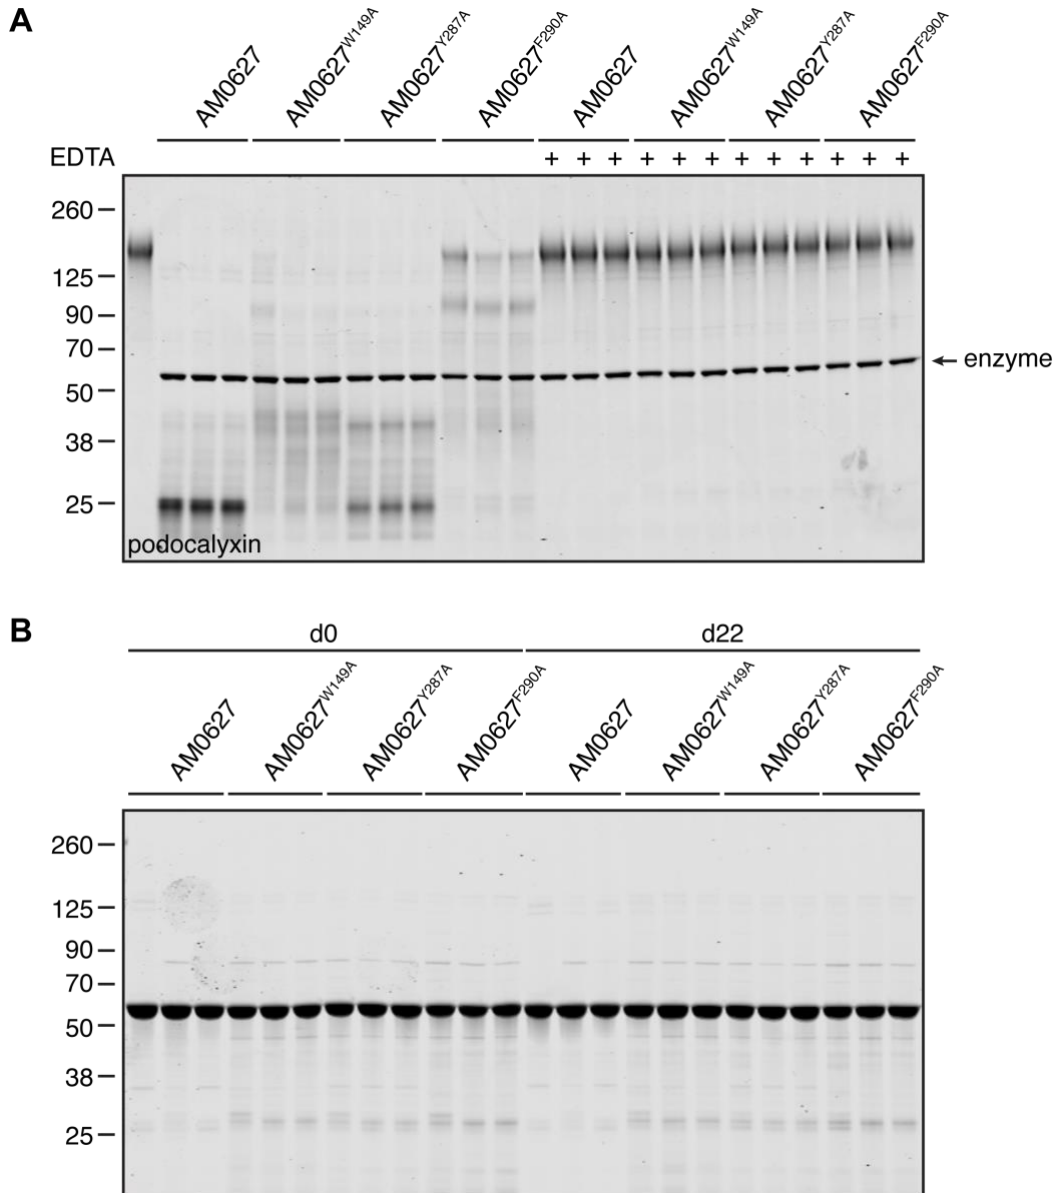

**Figure S7. Consistency of activity, metal dependence, and stability between independent AM0627 preparations.** *A*, podocalyxin was incubated with 500 nM AM0627 or AM0627 point mutants  $\pm$  25 mM EDTA for 22 h at 37 °C. Digests were separated by SDS-PAGE and visualized using Coomassie stain. *B*, SDS-PAGE analysis of variant preparations at day 0 (d0) and post storage at 4 °C for 22 days (d22) in PBS.

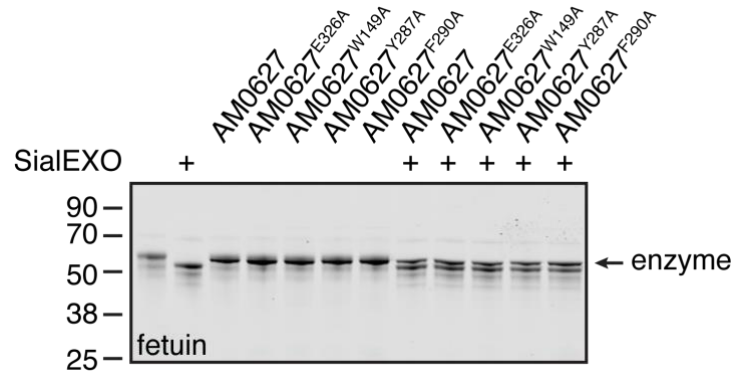

**Figure S8. Fetuin digests at high E:S.** Fetuin was incubated with 1  $\mu$ M AM0627 or AM0627 point mutants  $\pm$  1 U SialEXO for 22 h at 37  $^{\circ}$ C. Digests were separated by SDS-PAGE and visualized using Coomassie stain.

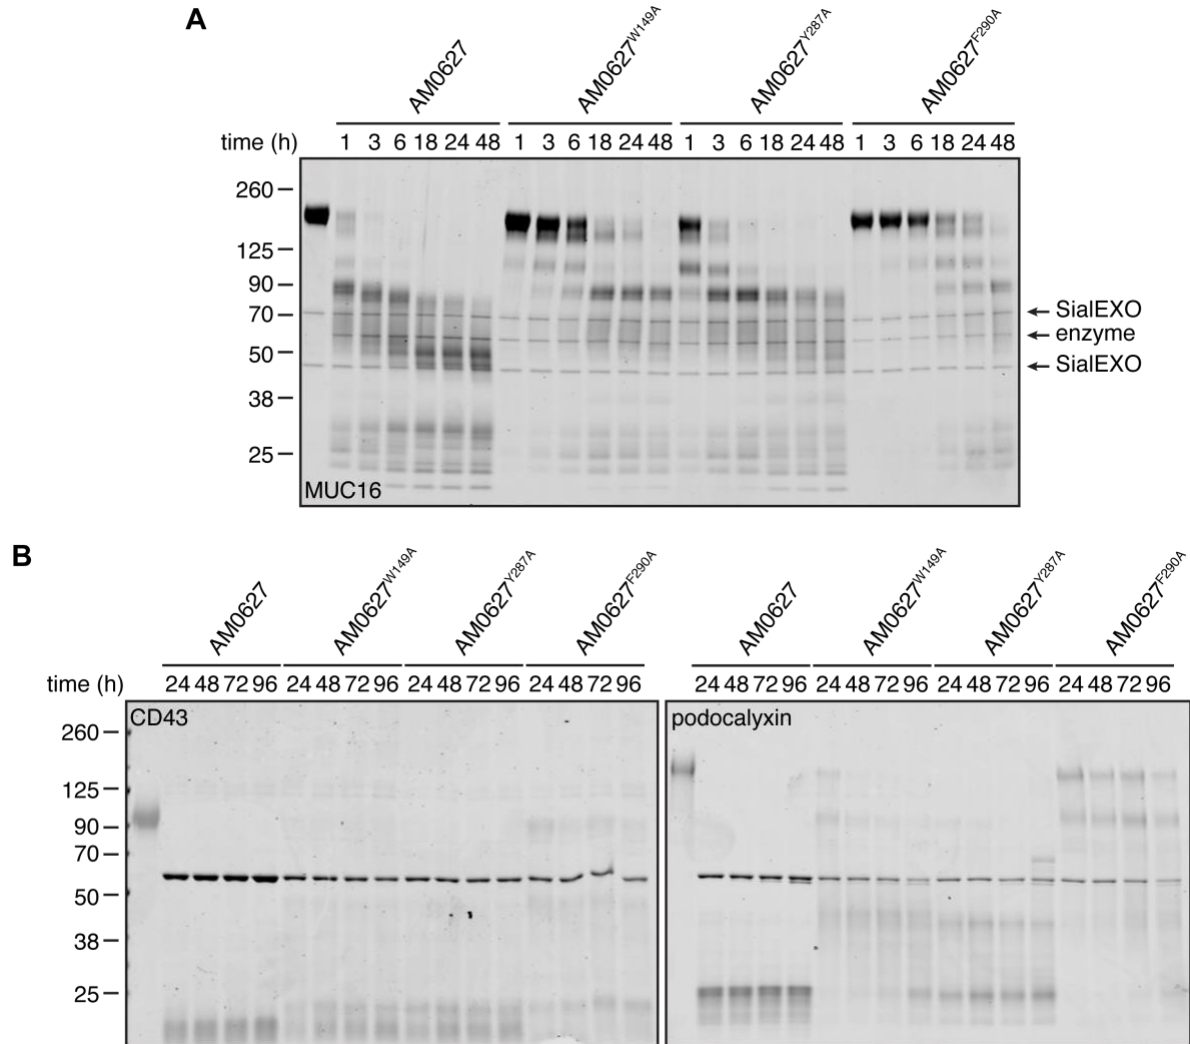

**Figure S9. Digestion kinetics.** *A*, recombinant MUC16 (0.5  $\mu$ g) was incubated with 50 nM AM0627 or AM0627 point mutants + 0.5 U SialEXO for the indicated times at 37  $^{\circ}$ C. Digests were separated by SDS-PAGE and visualized using Coomassie stain. *B*, recombinant CD43 and podocalyxin (1  $\mu$ g) were incubated with AM0627 or AM0627 point mutants at a 1:3 enzyme:substrate molar ratio for the indicated times at 37  $^{\circ}$ C. Digests were separated by SDS-PAGE and visualized using Coomassie stain.

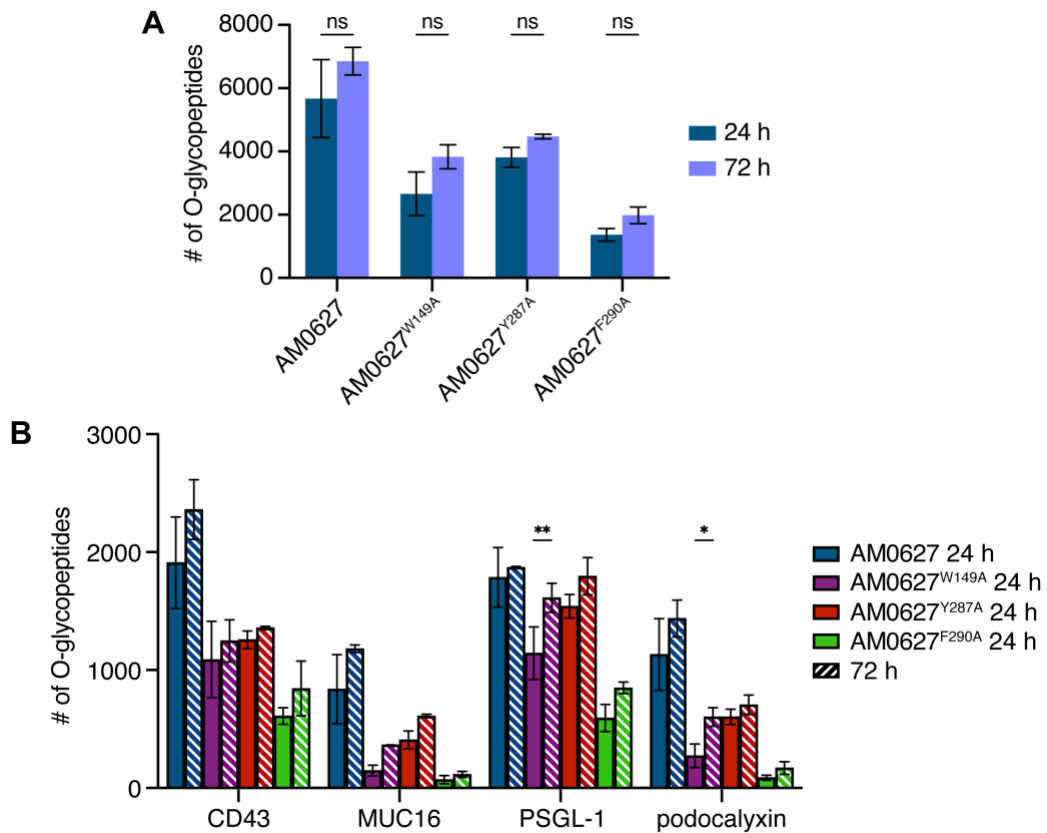

**Figure S10. O-glycopeptide counts.** *A* and *B*, recombinant glycoproteins (3  $\mu$ g) were digested with AM0627 or AM0627 mutants at a 1:3 enzyme-to-substrate ratio for 24 or 72 h, de-N-glycosylated, trypsinized, and subjected to mass spectrometry analysis. The total number of O-glycopeptides overall (*A*) and by substrate (*B*) are shown for each enzyme. Data are mean  $\pm$  s.d. ( $n = 2$ ).  $p$ -values were determined by two-way ANOVA with Bonferroni correction. \* $p < 0.05$ , \*\* $p < 0.005$ .

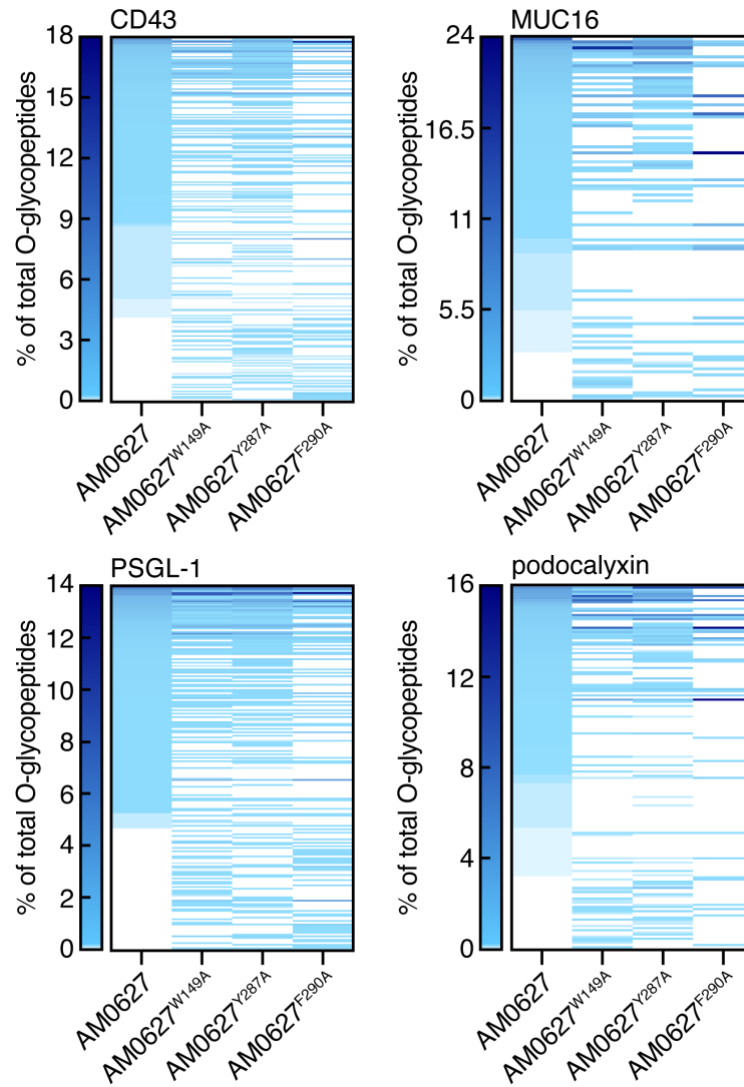

**Figure S11. O-glycopeptide sequence heat maps for 72-h digests.** Heat maps depicting the frequency of each O-glycopeptide sequence normalized to the total number of substrate O-glycopeptides generated by the enzyme after 72 h. Peptide sequences are ordered from highest to lowest frequency (top to bottom) for AM0627. Specific sequences and counts are listed in Dataset S3.

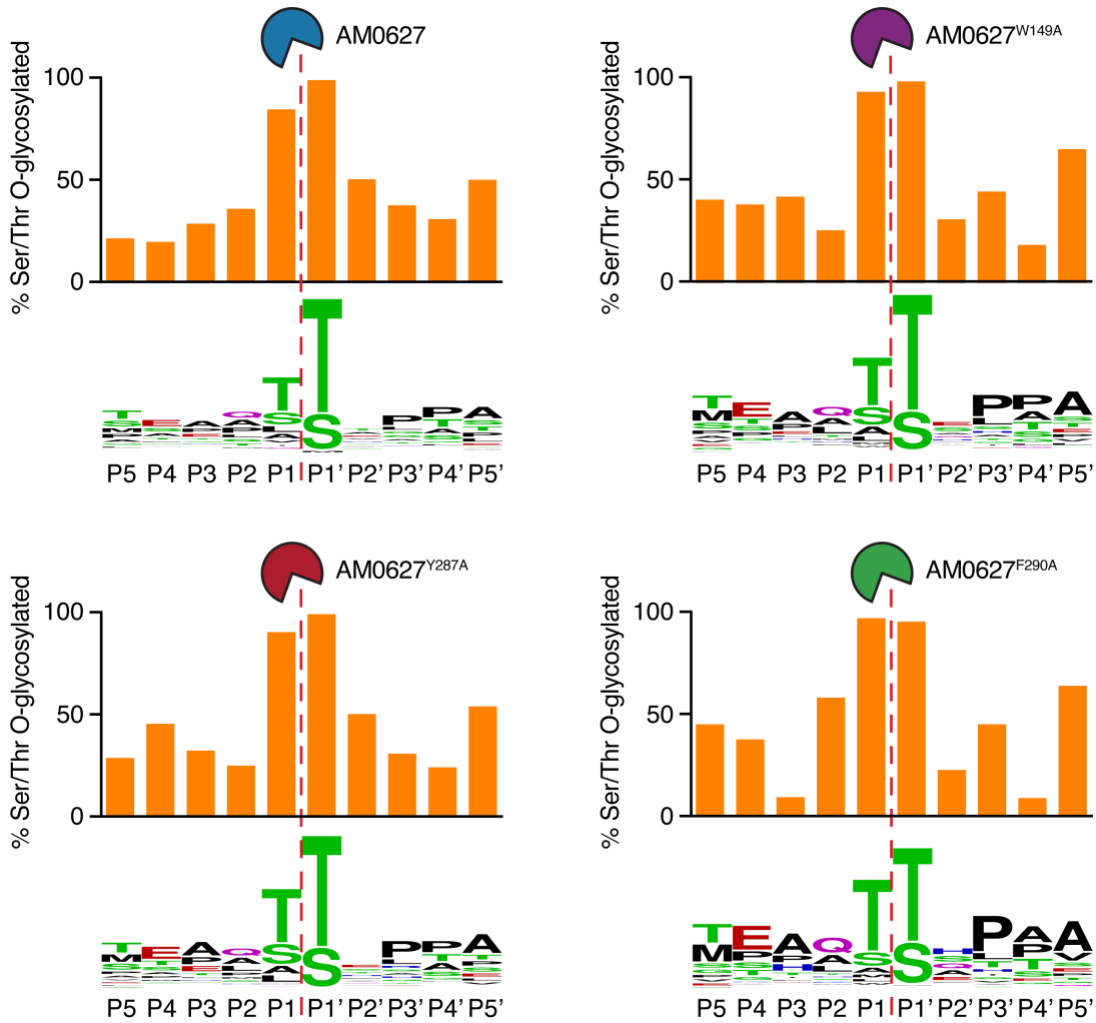

**Figure S12. Cleavage motifs.** Cleavage motifs determined using O-glycopeptides from 24-h digests. Peptides were used as input for [weblogo.berkeley.edu](http://weblogo.berkeley.edu) ( $\pm 5$  residues from the site of cleavage). The percent of O-glycosylated serine (Ser) and threonine (Thr) residues was determined by counting the number of modified residues at a given position relative to the total number of serine and threonine residues.

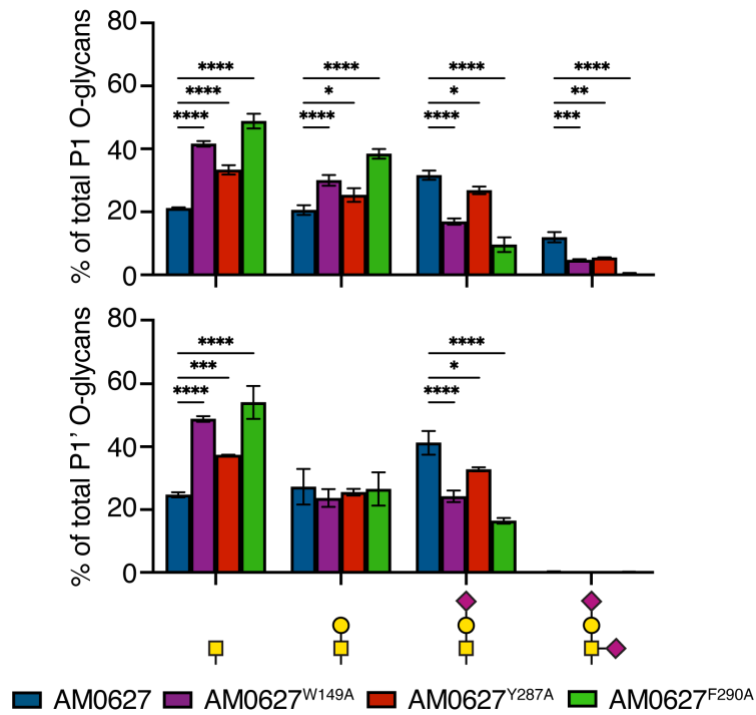

**Figure S13. O-glycan occurrences for 72-h digests.** Quantification of O-glycan occurrences at P1 (*top*) and P1' (*bottom*) for 72-h digests. Data are mean  $\pm$  s.d. ( $n = 2$ ).  $p$ -values were determined by two-way ANOVA with Dunnett correction. \* $p < 0.05$ , \*\* $p < 0.005$ , \*\*\* $p < 0.0005$ , \*\*\*\* $p < 0.0001$ .



**Table S3. Cloning primers**

| <b>Primer</b>               | <b>Sequence</b>                                   |
|-----------------------------|---------------------------------------------------|
| AM0627 <sup>W149A</sup> for | 5'-CCCCAACGGCGCGGGATTGCATAAAAA-3'                 |
| AM0627 <sup>W149A</sup> rev | 5'-TCTTTTGTGGGCTGCACT-3'                          |
| AM0627 <sup>Y287A</sup> for | 5'-GAACTTCAACGCCTACATGTTCCGCGACGGAGACGGAGTCGCC-3' |
| AM0627 <sup>Y287A</sup> rev | 5'-ACGCGGGCCAGGACGCGG-3'                          |
| AM0627 <sup>F290A</sup> for | 5'-CTACTACATGGCCC GCGACGGAGAC-3'                  |
| AM0627 <sup>F290A</sup> rev | 5'-TTGAAGTTCACGCGGGCC-3'                          |

**Table S4. Glycan compositions used for O-glycoproteomics search**

|                               |                                       |
|-------------------------------|---------------------------------------|
| HexNAc(1)                     | HexNAc(2)Hex(2)Fuc(1)NeuAc(2)         |
| HexNAc(1)Hex(1)               | HexNAc(1)Hex(1)NeuGc(1)               |
| HexNAc(1)NeuAc(1)             | HexNAc(1)Hex(1)NeuAc(1)NeuGc(1)       |
| HexNAc(2)Hex(1)               | HexNAc(1)Hex(1)NeuGc(2)               |
| HexNAc(1)Hex(1)NeuAc(1)       | HexNAc(2)Hex(2)NeuGc(1)               |
| HexNAc(1)Hex(1)NeuAc(2)       | HexNAc(2)Hex(2)NeuGc(2)               |
| HexNAc(2)Hex(2)NeuAc(1)       | HexNAc(2)Hex(2)NeuAc(1)NeuGc(1)       |
| HexNAc(2)Hex(2)NeuAc(2)       | HexNAc(2)Hex(1)NeuGc(1)               |
| HexNAc(2)Hex(2)               | HexNAc(2)Hex(2)Fuc(1)NeuGc(1)         |
| HexNAc(2)Hex(1)NeuAc(1)       | HexNAc(2)Hex(2)Fuc(1)NeuGc(2)         |
| HexNAc(2)Hex(2)Fuc(1)NeuAc(1) | HexNAc(2)Hex(2)Fuc(1)NeuAc(1)NeuGc(1) |
